# Supplementary material for: Interface modulation of Mo2C@foam nickel via MoS2 quantum dots for the electrochemical oxygen evolution reaction
Source: Royal Society of Chemistry journal article supplement (doi:10.1039/d0ta05045h), 2020-01-01
Supplement: d0ta05045h1.pdf [file d0ta05045h1.pdf]

**Interface Modulation of Mo<sub>2</sub>C@Foam Nickel via MoS<sub>2</sub> Quantum Dots for  
Electrochemical Oxygen Evolution Reaction**

Lei Lei <sup>a,b</sup>, Danlian Huang <sup>a,b,\*</sup>, Cui Lai <sup>a,b</sup>, Chen Zhang <sup>a,b</sup>, Rui Deng <sup>a,b</sup>, Yashi Chen <sup>a,b</sup>,  
Sha Chen <sup>a,b</sup>, Wenjun Wang <sup>a,b</sup>

<sup>a</sup> *College of Environmental Science and Engineering, Hunan University, Changsha,  
Hunan 410082, China*

<sup>b</sup> *Key Laboratory of Environmental Biology and Pollution Control (Hunan University),  
Ministry of Education, Changsha, Hunan 410082, China*

~~Synthesis of MoS<sub>2</sub>@Mo<sub>2</sub>C@NF~~: The synthesis of MoS<sub>2</sub>@Mo<sub>2</sub>C@NF was just adding

\* Corresponding author at: College of Environmental Science and Engineering, Hunan University, Changsha, Hunan

410082, China.

Tel.: +86-731-88822754; fax: +86-731-88823701.

E-mail address: huangdanlian@hnu.edu.cn (D.L. Huang).

Mo<sub>2</sub>C@NF during the synthesis of MoS<sub>2</sub> powders, so that MoS<sub>2</sub> grew in-situ on Mo<sub>2</sub>C@NF.

*Synthesis of MoS<sub>2</sub> QDs@NF:* The synthesis of MoS<sub>2</sub> QDs@NF was similar to MoS<sub>2</sub> QDs@Mo<sub>2</sub>C@NF except that Mo<sub>2</sub>C@NF was replaced by a bare NF.

*Synthesis of MoS<sub>2</sub> QDs@Mo<sub>2</sub>C:* The mixture of 0.05 g (NH<sub>4</sub>)<sub>6</sub>Mo<sub>7</sub>O<sub>24</sub> and 0.05 g Na<sub>3</sub>C<sub>6</sub>H<sub>5</sub>O<sub>7</sub>•2H<sub>2</sub>O were ground to fine powders. Afterwards, the Mo<sub>2</sub>C was obtained by calcinating above-mentioned powders at 500°C under Ar for 1 h at a rate of 5°C min<sup>-1</sup>. Then, ~50 mg of the as-prepared Mo<sub>2</sub>C was added into the collected MoS<sub>2</sub> sheets supernatant (70 mL), and was transferred into a 100 ml of Teflon-lined stainless-steel autoclave and was heated at 140°C for 24 h, the MoS<sub>2</sub> QDs@Mo<sub>2</sub>C was obtained.

*Preparation of MoS<sub>2</sub> QDs@Mo<sub>2</sub>C and Ru<sub>2</sub>O electrodes:* The MoS<sub>2</sub> QDs@Mo<sub>2</sub>C and Ru<sub>2</sub>O electrodes were prepared by binding the prepared MoS<sub>2</sub> QDs@Mo<sub>2</sub>C and commercial RuO<sub>2</sub> powders onto the bare NF surface using isopropanol and 5 wt% Nafion solution (DuPont, USA) as dispersing agent and binding agent, respectively. In detail, ~2.35 mg MoS<sub>2</sub> QDs@Mo<sub>2</sub>C powders and ~2.35 mg RuO<sub>2</sub> powders were added respectively into a mixture of isopropanol, Nafion and deionized water (0.31/0.62/0.07 volume ratio), and blended to obtain a paste. The resultant paste was incorporated onto the NF surface and dried at room temperature to obtain MoS<sub>2</sub> QDs@Mo<sub>2</sub>C and Ru<sub>2</sub>O electrodes. For convenience, the electrodes were labeled as MoS<sub>2</sub> QDs@Mo<sub>2</sub>C-bound NF and RuO<sub>2</sub>@NF, respectively. The quantification in the material preparation process was optimized, and the catalyst synthesis was subjected to at least five parallel

experiments to obtain reliable loading data.

#### *Density functional theory calculation*

The plane-waves cutoff energy of 330 eV and the conjugate gradient algorithm were selected to assess the electronic ground state with a convergence threshold of  $2.0 \times 10^{-6}$  eV atom<sup>-1</sup>. The tolerance for structural optimization was fixed at  $2.0 \times 10^{-5}$  eV atom<sup>-1</sup> for energy and 0.05 eV Å<sup>-1</sup> for force. All of the structures were fully optimized and relaxed to the ground state.

The OER can proceed by the following steps in the alkaline medium:

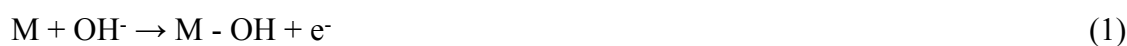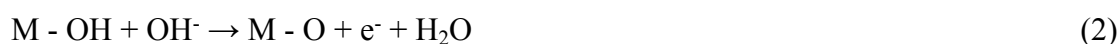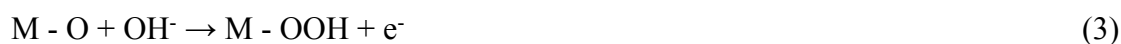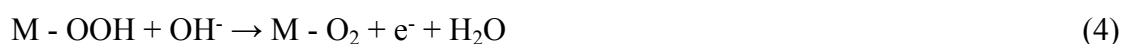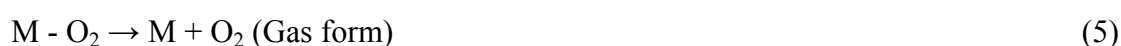

M referred to the catalyst. Step 1 represented the adsorption and discharge of OH<sup>-</sup> at catalyst surface to generate adsorbed OH species. In the step 2, the OH<sup>-</sup> interacted with the adsorbed OH species to create adsorbed atomic O and H<sub>2</sub>O followed the release of an electron. In the step 3, the OH<sup>-</sup> combined with an adsorbed O atom to produce adsorbed OOH species. In the step 4, the OOH species interacted with additional OH<sup>-</sup> anions to generate adsorbed O<sub>2</sub> and H<sub>2</sub>O molecules followed the release of an electron. Finally, the step 5 presented desorption of the adsorbed O<sub>2</sub> molecule.

The activity of OER was incarnated by the Gibbs free energy change ( $\Delta G_i$ ):

$$\Delta G_i = \Delta E_i + \Delta ZPE_i - T\Delta S_i - neU - 2.303k_B T \text{pH} \quad (6)$$

where  $\Delta G_i$  represented the variations of the free energy at  $i$ th reaction step.  $\Delta G$  of each reaction step was assessed based on computational hydrogen electrode (CHE) model.  $\Delta E$  was the reaction energy computed directly from the DFT calculations. The zero-point energy corrections ( $\Delta ZPE$ ) and the entropy changes ( $T\Delta S$ ) were obtained from vibrational frequency calculations and standard tables for gas-phase molecules, at 1 bar and 300 K,  $T\Delta S$  was approximately -0.2 eV.  $-neU$  represented the effect of the external potential for the electrochemical step, where  $n$  was the number of transferred electrons and  $U$  was the electrode potential relative to the standard hydrogen electrode.  $k_B$  was the Boltzmann constant. The vibrational frequency analyses of the gas-phase molecules and adsorbed species were implemented specifically to achieve ZPE. The MoS<sub>2</sub> QDs were fixed assuming that they encountered relatively minor vibrations [1].

The standard equilibrium potential for DFT computations of the overall reaction is  $E^0 = 1.23$  vs RHE. The binding energy of intermediates in the model is defined in equilibrium potential ( $E_i^0$ ) of each elementary electron-transfer (ET) step, as following formula:  $E_i^0 = \Delta G_i^0/e$ , where  $i$  refers to sequence number of elementary ET steps and  $e$  is the elementary charge.  $\Delta G_i^0$  (in eV) is the reaction free energy of the elementary ET step, which is determined by the binding energy of intermediates. In our work, the equilibrium potential of rate-determining step is defined by  $E_{\text{OER}}^0 = \text{Max}(E_i^0)$  [2].

**Table S1** Measurements of catalyst loading (mg cm<sup>-2</sup>).

| Catalyst                                  | 1#    | 2#    | 3#    | 4#    | 5#    | Average loading        |
|-------------------------------------------|-------|-------|-------|-------|-------|------------------------|
|                                           | (mg)  | (mg)  | (mg)  | (mg)  | (mg)  | (mg cm <sup>-2</sup> ) |
| Bare NF                                   | 186.4 | 186.9 | 182.1 | 185.1 | 183.7 |                        |
| MoS <sub>2</sub> QDs@Mo <sub>2</sub> C@NF | 202.5 | 205.0 | 196.2 | 217.2 | 197.4 | ~2.35                  |

Note: The total surface area of the material is ~ 8 cm<sup>2</sup> assuming that the whole material surface is catalytically active toward the OER.

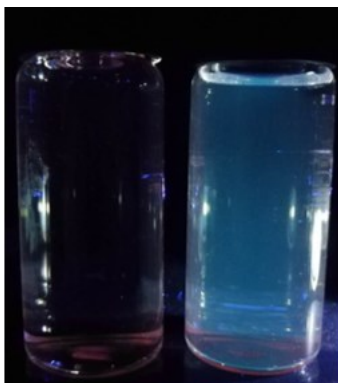

Fig. S1 photograph of H<sub>2</sub>O (left) and MoS<sub>2</sub> QDs (right) solutions.

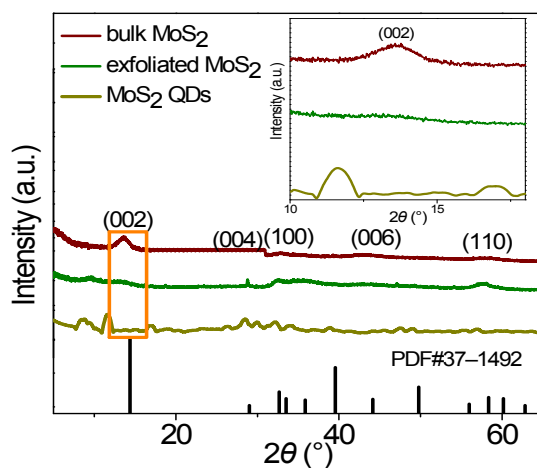

Fig. S2 XRD patterns of MoS<sub>2</sub>-based samples. The inset showed the enlarged view of the orange area. The standard card of MoS<sub>2</sub> (PDF#37-1492) was presented for

comparison.

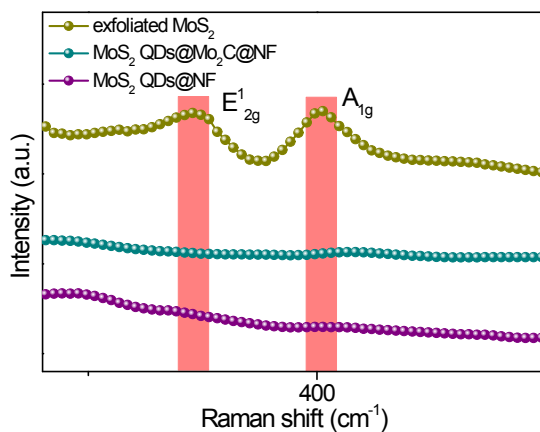

**Fig. S3** Enlarged Raman spectrums of exfoliated MoS<sub>2</sub>, MoS<sub>2</sub> QDs@Mo<sub>2</sub>C@NF and MoS<sub>2</sub> QDs@NF in the pink area of Fig. 1d.

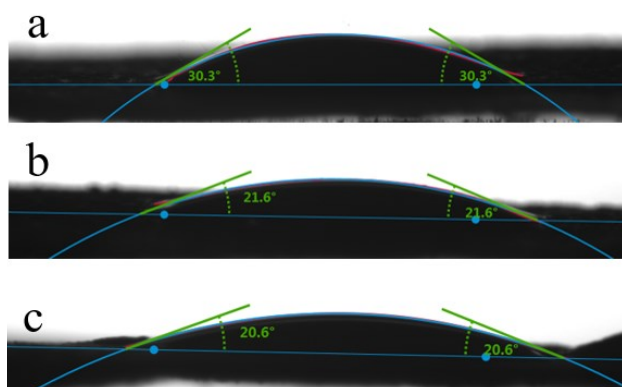

**Fig. S4** Static contact angle measurements of (a) Mo<sub>2</sub>C@NF, (b) MoS<sub>2</sub> QDs@NF and (c) MoS<sub>2</sub> QDs@Mo<sub>2</sub>C@NF.

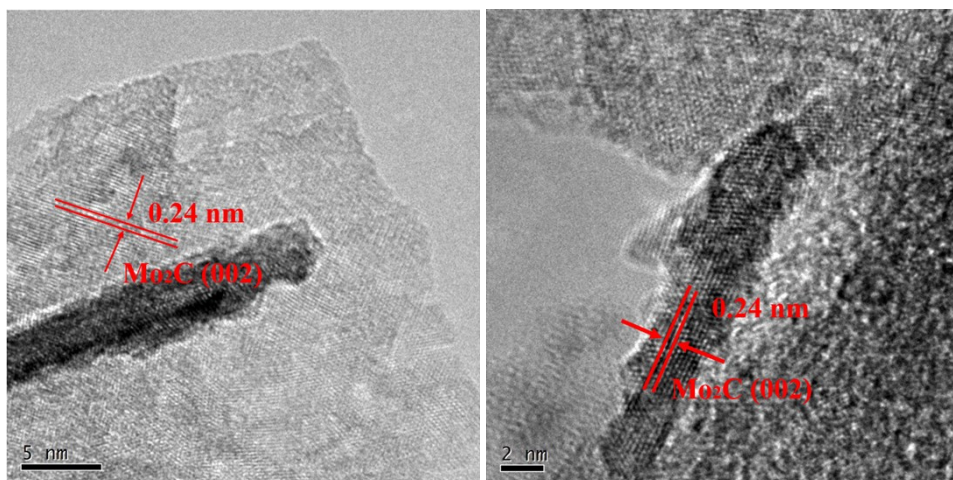

Fig. S5 HRTEM images of (left) Mo<sub>2</sub>C@NF and (right) Mo<sub>2</sub>C@NF after the hydrothermal process at 200°C for 20 h.

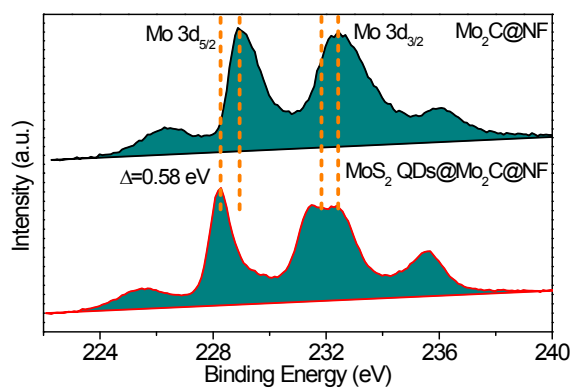

Fig. S6 Mo 3d XPS spectra of Mo<sub>2</sub>C@NF and MoS<sub>2</sub> QDs@Mo<sub>2</sub>C@NF.

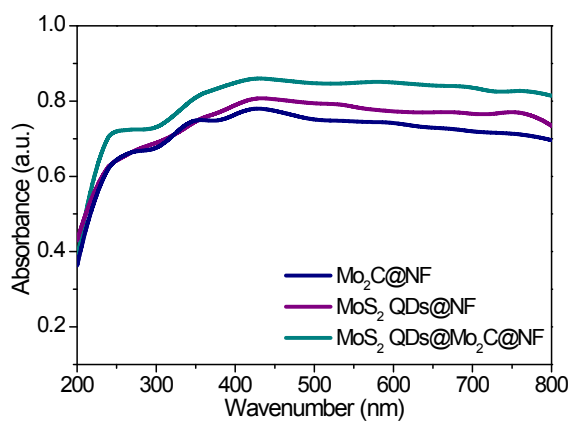

Fig. S7 UV-vis DRS of Mo<sub>2</sub>C@NF, MoS<sub>2</sub> QDs@NF and MoS<sub>2</sub> QDs@Mo<sub>2</sub>C@NF.

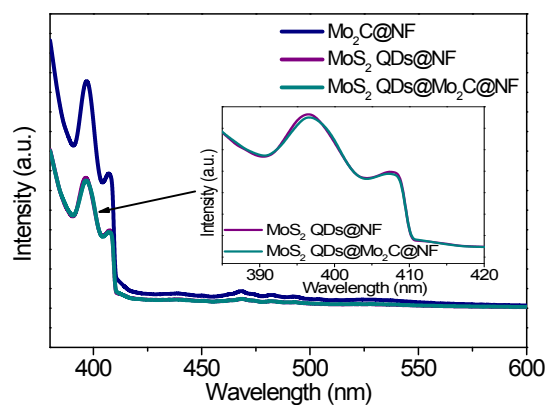

Fig. S8 PL spectra of Mo<sub>2</sub>C@NF, MoS<sub>2</sub> QDs@NF and MoS<sub>2</sub> QDs@Mo<sub>2</sub>C@NF.

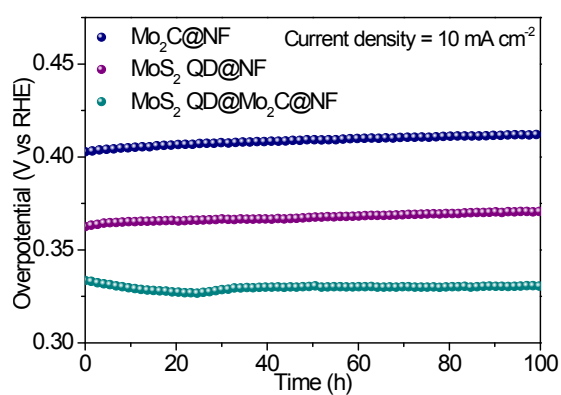

Fig. S9 Chronopotentiometry curves at current density of 10 mA cm<sup>-2</sup>.

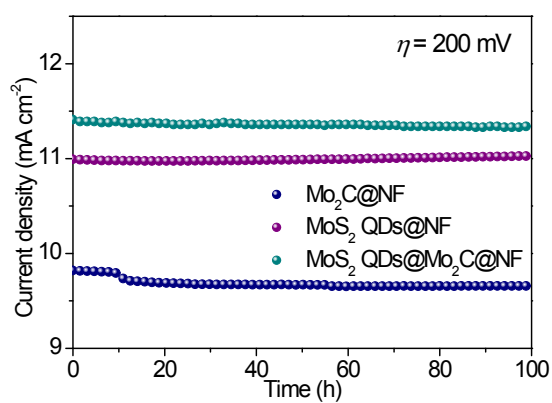

Fig. S10 Chronoamperometry curves under 200 mV static overpotential.

Table S2 Calculated values of the  $j_0$  of various catalysts.

| Catalyst             | Log( j (mA cm <sup>-2</sup> ) ) at $\eta=0$ V | $j_0$ (mA cm <sup>-2</sup> ) |
|----------------------|-----------------------------------------------|------------------------------|
| Mo <sub>2</sub> C@NF | -2.13                                         | $7.4 \times 10^{-3}$         |



|                                           |       |       |
|-------------------------------------------|-------|-------|
| MoS <sub>2</sub> QDs@NF                   | -2.0  | 0.01  |
| MoS <sub>2</sub> QDs@Mo <sub>2</sub> C@NF | -1.83 | 0.015 |
| RuO <sub>2</sub> @NF                      | -1.67 | 0.021 |

**Table S3** Comparison of OER performance of MoS<sub>2</sub> QDs@Mo<sub>2</sub>C@NF with reported MoS<sub>2</sub>- or Mo<sub>2</sub>C-based electrocatalysts in 1.0 M KOH.

| Catalyst                                                                             | Loading (mg cm <sup>-2</sup> ) | $\eta$ (mV) at $j=10$ mA cm <sup>-2</sup> | Tafel slope (mV dec <sup>-1</sup> ) | Reference |
|--------------------------------------------------------------------------------------|--------------------------------|-------------------------------------------|-------------------------------------|-----------|
| MoS <sub>2</sub> /Co <sub>9</sub> S <sub>8</sub> /Ni <sub>3</sub> S <sub>2</sub> /Ni | 1.86                           | 166                                       | 58                                  | [3]       |
| Co <sub>3</sub> O <sub>4</sub> @MoS <sub>2</sub> /CC                                 | 3.5                            | 269                                       | 58                                  | [4]       |
| Co <sub>3</sub> S <sub>4</sub> @MoS <sub>2</sub>                                     | 0.283                          | 280                                       | 43                                  | [5]       |
| oxygenated-CoS <sub>2</sub> -MoS <sub>2</sub>                                        | 1.0                            | 272                                       | 45                                  | [6]       |
| MoS <sub>2</sub> /NiS NCs                                                            | 4.9                            | 271                                       | 53                                  | [7]       |
| Co covalently doped MoS <sub>2</sub>                                                 | 2.0                            | 260                                       | 85                                  | [8]       |
| MoS <sub>2</sub> /Fe <sub>5</sub> Ni <sub>4</sub> S <sub>8</sub> /FeNi foam          | 0.153                          | 204                                       | 28.6                                | [9]       |
| Ni <sub>3</sub> S <sub>2</sub> @MoS <sub>2</sub> /FeOOH                              | 2                              | 234                                       | 49                                  | [10]      |
| MoO <sub>x</sub> @N-doped MoS <sub>2-x</sub>                                         | 0.36                           | 270                                       | 61                                  | [11]      |
| MoS <sub>2</sub> /NiFe-LDH                                                           | 0.21                           | 210                                       | 46                                  | [12]      |
| Co <sub>3</sub> O <sub>4</sub> /MoS <sub>2</sub>                                     | 2                              | 230 ( $j=20$ mA cm <sup>-2</sup> )        | 45                                  | [13]      |
| MoS <sub>2</sub> @CoNi-ZIF                                                           | 0.143                          | 340                                       | 61                                  | [14]      |
| Co <sub>4</sub> S <sub>3</sub> /Mo <sub>2</sub> C-NSC                                | 0.425                          | 268                                       | 61.2                                | [15]      |
| Co <sub>0.1</sub> - $\beta$ -Mo <sub>2</sub> C@NC                                    | 0.28                           | 262.2                                     | 28.8                                | [16]      |
| Mo <sub>2</sub> C@NC/Co@NG                                                           | 0.18                           | 424                                       | 51                                  | [17]      |
| Co/ $\beta$ -Mo <sub>2</sub> C@N-CNT                                                 | 0.014                          | 356                                       | 67                                  | [18]      |
| Co-NC@Mo <sub>2</sub> C                                                              | 0.83                           | 347                                       | 61                                  | [19]      |
| B <sub>3</sub> N:Mo <sub>2</sub> C@BCN NPs                                           | 1.0                            | 290                                       | 61                                  | [20]      |
| Co-Mo <sub>2</sub> C NPs                                                             | 0.24                           | 347                                       | 38                                  | [21]      |
| Co <sub>9</sub> S <sub>8</sub> -NSC@Mo <sub>2</sub> C                                | 0.425                          | 293                                       | 59.7                                | [22]      |
| Co <sub>2</sub> P/Mo <sub>2</sub> C/Mo <sub>3</sub> Co <sub>3</sub> C@C              | 0.80                           | 362                                       | 82                                  | [23]      |

|                                           |      |     |    |           |
|-------------------------------------------|------|-----|----|-----------|
| Ni/Ni <sub>2</sub> P/Mo <sub>2</sub> C@C  | 0.30 | 368 | 75 | [23]      |
| MoS <sub>2</sub> QDs@Mo <sub>2</sub> C@NF | 2.35 | 110 | 57 | This work |

Table S4 Resistance fitted according to the Nyquist plots of different samples.

| Catalyst                                  | $R_s$ ( $\Omega$ ) | $R_{ct}$ ( $\Omega$ ) |
|-------------------------------------------|--------------------|-----------------------|
| Mo <sub>2</sub> C@NF                      | 0.11717            | 1.846                 |
| MoS <sub>2</sub> QDs@NF                   | 0.12621            | 1.827                 |
| MoS <sub>2</sub> QDs@Mo <sub>2</sub> C@NF | 0.12403            | 1.704                 |

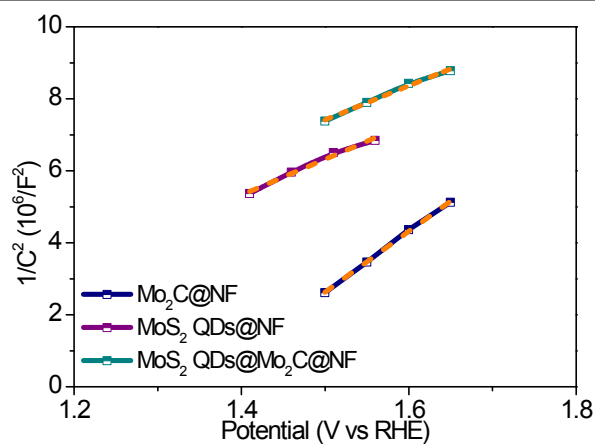

Fig. S11 Mott-Schottky plots of Mo<sub>2</sub>C@NF, MoS<sub>2</sub> QDs@NF and MoS<sub>2</sub> QDs@Mo<sub>2</sub>C@NF.

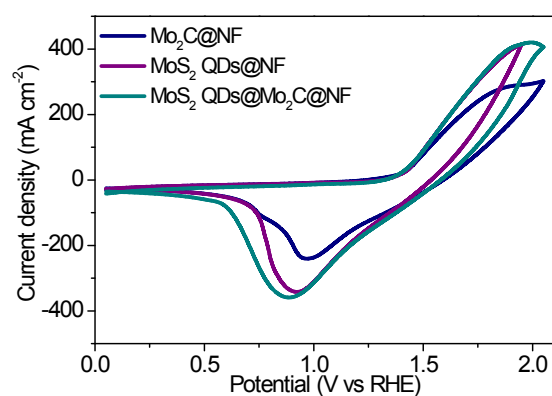

Fig. S12 The CV curves in 1.0 M KOH for Mo<sub>2</sub>C@NF, MoS<sub>2</sub> QDs@NF and MoS<sub>2</sub> QDs@Mo<sub>2</sub>C@NF.

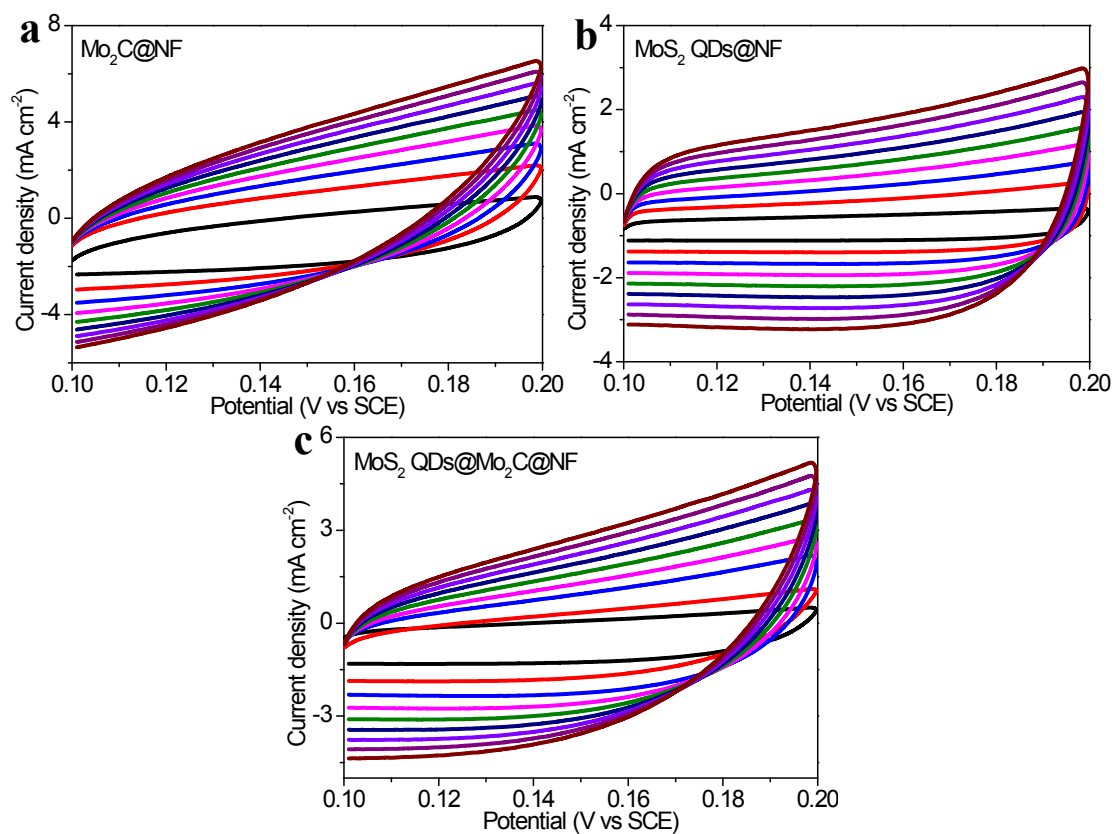

Fig. S13 CV for different electrocatalysts at different scan rates of 20, 40, 60, 80, 100, 120, 140, 160, 180  $\text{mV s}^{-1}$  from inner to out, respectively. (a)  $\text{Mo}_2\text{C@NF}$ , (b)  $\text{MoS}_2$  QDs@NF and (c)  $\text{MoS}_2$  QDs@ $\text{Mo}_2\text{C@NF}$ .

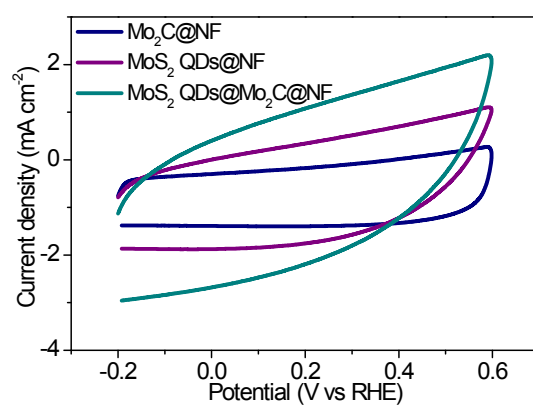

Fig. S14 The CV curves in 1.0 M PBS for  $\text{Mo}_2\text{C@NF}$ ,  $\text{MoS}_2$  QDs@NF and  $\text{MoS}_2$  QDs@ $\text{Mo}_2\text{C@NF}$ .

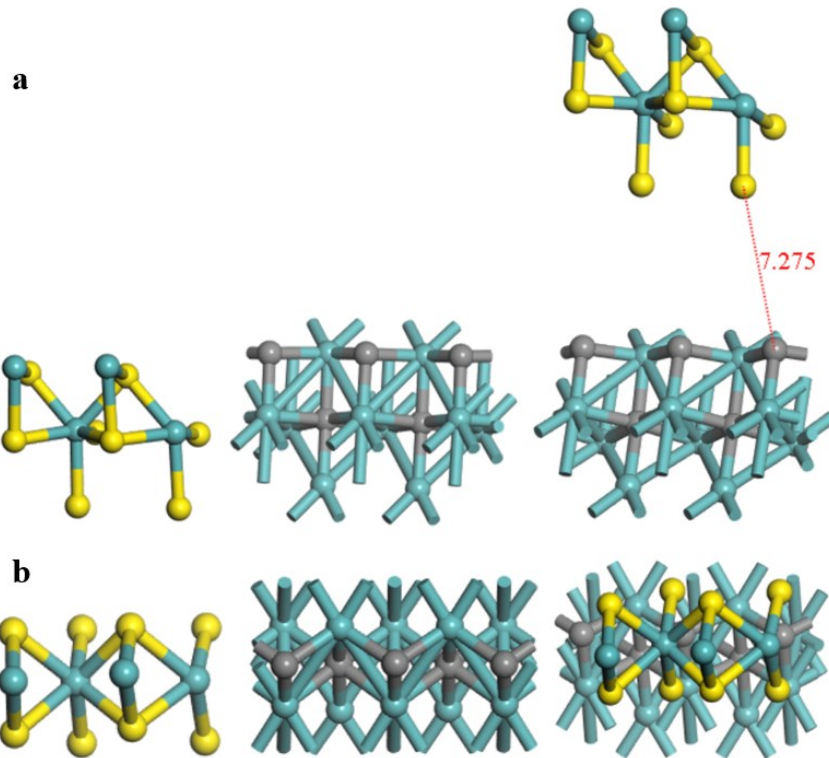

**Fig. S15 (a)** Side-view and **(b)** top-view of a part of the optimized MoS<sub>2</sub> QDs@NF (left), Mo<sub>2</sub>C@NF (middle) and MoS<sub>2</sub> QDs@Mo<sub>2</sub>C@NF (right) (NF is omitted) according to the (100) basal plane for the calculation. Dark cyan, yellow and gray balls represent Mo, S and C atoms, respectively.

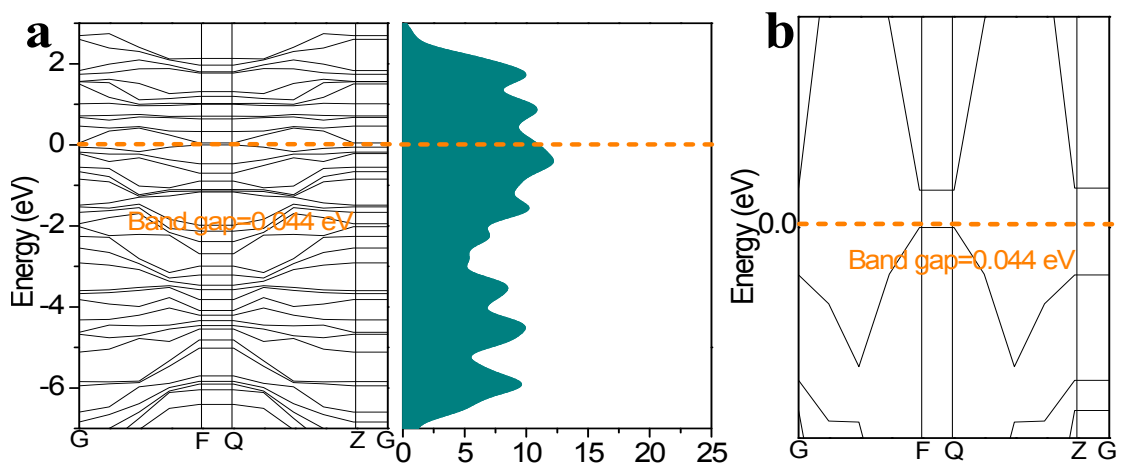

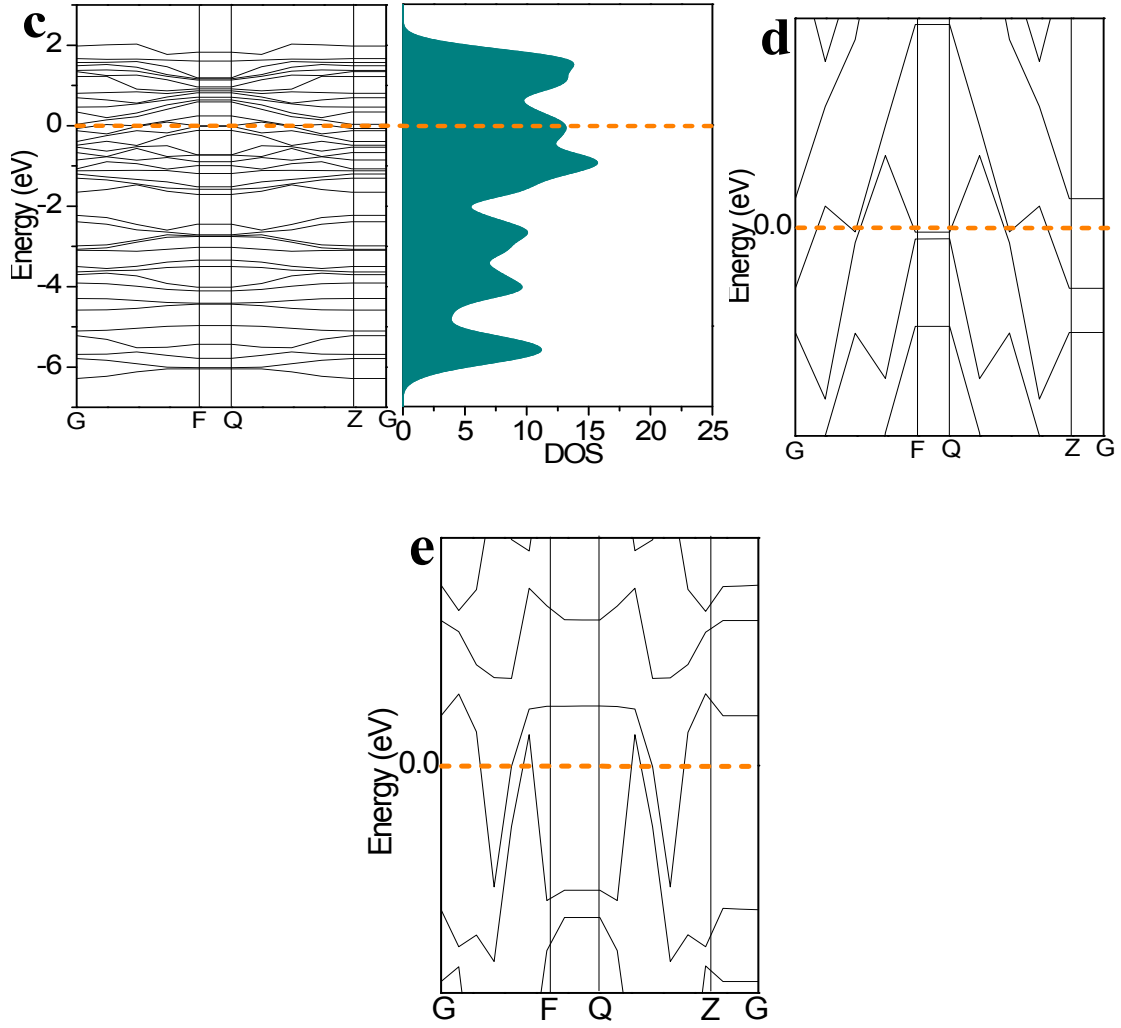

**Fig. S16** Band structure and corresponding TDOS of **(a)**  $\text{MoS}_2@\text{NF}$  and **(c)**  $\text{Mo}_2\text{C}@NF$ . **(b)** and **(d)** are enlarged views near horizontal dashed lines in **(a)** and **(c)**, respectively. **(e)** is the enlarged view near horizontal dashed lines in Fig. 7c. The horizontal dashed lines indicate the Fermi level.

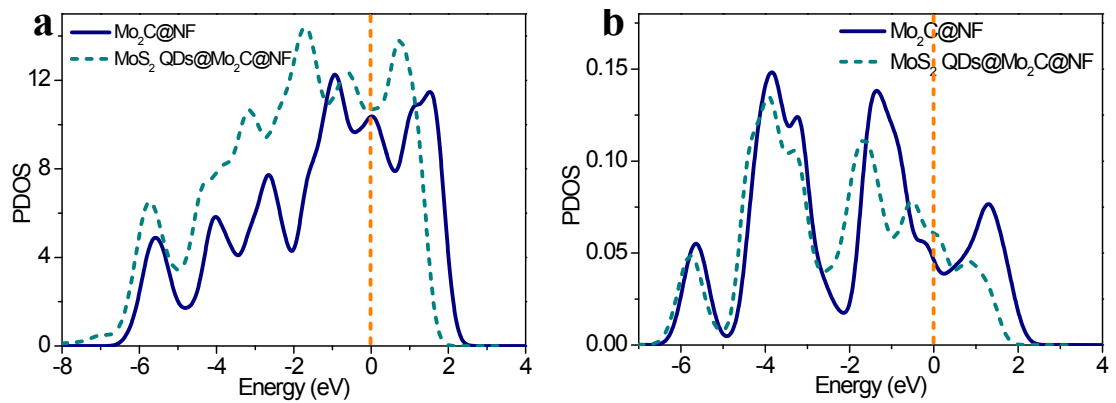

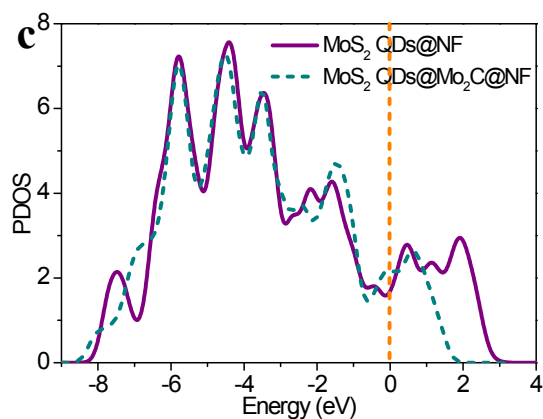

Fig. S17 PDOS plots for (a) Mo atom and (b) C atom in Mo<sub>2</sub>C@NF and MoS<sub>2</sub> QDs@Mo<sub>2</sub>C@NF. (c) PDOS plots for S atom in MoS<sub>2</sub> QDs@NF and MoS<sub>2</sub> QDs@Mo<sub>2</sub>C@NF. The vertical dashed lines indicate the Fermi level.

## Reference

- [1] B. Mohanty, M. Ghorbani-Asl, S. Kretschmer, A. Ghosh, P. Guha, S. K. Panda, B. Jena, A.V. Krasheninnikov and B.K. Jena, *ACS Catal.*, 2018, 8, 1683-1689.
- [2] H. B. Tao, J. Zhang, J. Chen, L. Zhang, Y. Xu, J. G. Chen and B. Liu, *J. Am. Chem. Soc.*, 2019, 141, 13803-13811.
- [3] Y. Yang, H. Yao, Z. Yu, S. M. Islam, H. He, M. Yuan, Y. Yue, K. Xu, W. Hao, G. Sun, H. Li, S. Ma, P. Zapol and M. G. Kanatzidis, *J. Am. Chem. Soc.*, 2019, 141, 10417-10430.
- [4] J. Liu, J. Wang, B. Zhang, Y. Ruan, H. Wan, X. Ji, K. Xu, D. Zha, L. Miao and J. Jiang, *J. Mater. Chem. A*, 2018, 6, 2067-2072.
- [5] Y. Guo, J. Tang, Z. Wang, Y. Kang, Y. Bando and Y. Yamauchi, *Nano Energy*, 2018, 47, 494-502.
- [6] J. Hou, B. Zhang, Z. Li, S. Cao, Y. Sun, Y. Wu, Z. Gao and L. Sun, *ACS Catal.*,

2018, 8, 4612-4621.

- [7] Z. Zhai, C. Li, L. Zhang, H. Wu, L. Zhang, N. Tang, W. Wang and J. Gong, J. Mater. Chem. A, 2018, 6, 9833-9838.
- [8] Q. Xiong, Y. Wang, P. Liu, L. Zheng, G. Wang, H. Yang, P. Wong, H. Zhang and H. Zhao, Adv. Mater., 2018, 30, 1801450.
- [9] Y. Wu, F. Li, W. Chen, Q. Xiang, Y. Ma, H. Zhu, P. Tao, C. Song, W. Shang, T. Deng and J. Wu, Adv. Mater., 2018, 30, 1803151.
- [10] M. Zheng, K. Guo, W. Jiang, T. Tang, X. Wang, P. Zhou, J. Du, Y. Zhao, C. Xu and J. Hu, Appl. Catal. B-Environ., 2019, 244, 1004-1012.
- [11] Y. Wang, S. Liu, X. Hao, S. Luan, H. You, J. Zhou, D. Song, D. Wang, H. Li and F. Gao, J. Mater. Chem. A, 2019, 7, 10572-10580.
- [12] P. Xiong, X. Zhang, H. Wan, S. Wang, Y. Zhao, J. Zhang, D. Zhou, W. Gao, R. Ma, T. Sasaki and G. Wang, Nano Lett., 2019, 19, 4518-4526.
- [13] A. Muthurasu, V. Maruthapandian and H. Y. Kim, Appl. Catal. B-Environ., 2019, 248, 202-210.
- [14] Y. Liu, B. Hu, S. Wu, M. Wang, Z. Zhang, B. Cui, L. He and M. Du, Appl. Catal. B-Environ., 2019, 258, 117970.
- [15] Y. Liu, X. Luo, C. Zhou, S. Du, D. Zhen, B. Chen, J. Li, Q. Wu, Y. Iru and D. Chen, Appl. Catal. B-Environ., 2020, 260, 118197.
- [16] X. Zhu, X. Zhang, L. Huang, Y. Liu, H. Zhang and S. Dong, Chem. Commun.,

2019, 55, 9995-9998.

[17] Y. Wang, K. Li, F. Yan, C. Li, C. Zhu, X. Zhang and Y. Chen, *Nanoscale*, 2019, 11, 12563-12572.

[18] T. Ouyang, Y. Ye, C. Wu, K. Xiao and Z. Liu, *Angew. Chem. Int. Ed.*, 2019, 58, 4923-4928.

[19] Q. Liang, H. Jin, Z. Wang, Y. Xiong, S. Yuan, X. Zeng, D. He and S. Mu, *Nano Energy*, 2019, 57, 746-752.

[20] M. A. R. Anjum, M. H. Lee and J. S. Lee, *ACS Catal.*, 2018, 8, 8296-8305.

[21] M. Kim, S. Kim, D. Song, S. Oh, K. J. Chang and E. Cho, *Appl. Catal. B- Environ.*, 2018, 227, 340-348.

[22] X. Luo, Q. Zhou, S. Du, J. Li, J. Zhong, X. Deng and Y. Liu, *ACS Appl. Mater. Interfaces*, 2018, 10, 22291-22302.

[23] X. Li, X. Wang, J. Zhou, L. Han, C. Sun, Q. Wang and Z. Su, *J. Mater. Chem. A*, 2018, 6, 5789-5796.
